# Supplementary material for: Menopause Is Associated with an Altered Gut Microbiome and Estrobolome, with Implications for Adverse Cardiometabolic Risk in the Hispanic Community Health Study/Study of Latinos
Source: PubMed Central journal article supplement (PMC9239235; doi:10.1128/msystems.00273-22), 2022-04-13
Supplement: reviewer-comments.pdf [file reviewer-comments.pdf]

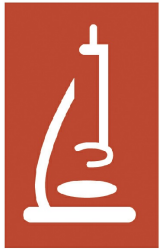

AMERICAN  
SOCIETY FOR  
MICROBIOLOGY

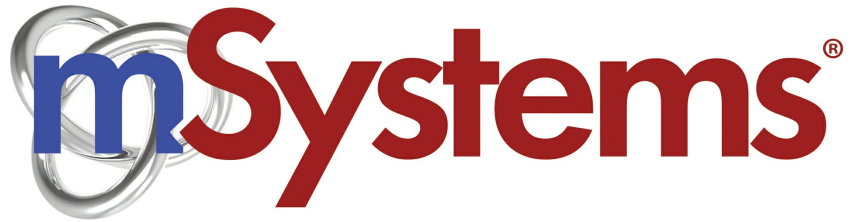

# Menopause is associated with an altered gut microbiome and estrobolome with implications for adverse cardiometabolic risk in the Hispanic Community Health Study/Study of Latinos (HCHS/SOL)

Brandilyn Peters, Juan Lin, Qibin Qi, Mykhaylo Usyk, Carmen Isasi, Yasmin Mossavar-Rahmani, Carol Derby, Nanette Santoro, Krista Perreira, Martha Daviglius, Michelle Kominiarek, Jianwen Cai, Rob Knight, Robert Burk, and Robert Kaplan

*Corresponding Author(s): Brandilyn Peters, Albert Einstein College of Medicine*

---

## Review Timeline:

Submission Date:

March 16, 2022

Accepted:

March 30, 2022

---

*Editor: Thomas Sharpton*

*Reviewer(s): The reviewers have opted to remain anonymous.*

## Transaction Report:

(Note: With the exception of the correction of typographical or spelling errors that could be a source of ambiguity, letters and reports are not edited. The original formatting of letters and referee reports may not be reflected in this compilation.)

**DOI:** <https://doi.org/10.1128/msystems.00273-22>

March 30, 2022

Dr. Brandilyn A Peters  
Albert Einstein College of Medicine  
Epidemiology and Population Health  
1300 Morris Park Ave  
Belfer 1315AB  
The Bronx, NY

Re: mSystems00273-22 (Menopause is associated with an altered gut microbiome and estrobolome with implications for adverse cardiometabolic risk in the Hispanic Community Health Study/Study of Latinos (HCHS/SOL))

Dear Dr. Brandilyn A Peters:

Thank you for submitting your revised manuscript to mSystems. I am happy to inform you that your manuscript has been accepted, and I am forwarding it to the ASM Journals Department for publication.

For your reference, ASM Journals' address is given below. Before it can be scheduled for publication, your manuscript will be checked by the mSystems production staff to make sure that all elements meet the technical requirements for publication. They will contact you if anything needs to be revised before copyediting and production can begin. Otherwise, you will be notified when your proofs are ready to be viewed.

ASM policy requires that data be available to the public upon online posting of the article, so please verify all links to sequence records, if present, and make sure that each number retrieves the full record of the data. If a new accession number is not linked or a link is broken, provide production staff with the correct URL for the record. If the accession numbers for new data are not publicly accessible before the expected online posting of the article, publication of your article may be delayed; please contact the ASM production staff immediately with the expected release date.

As an open-access publication, mSystems receives no financial support from paid subscriptions and depends on authors' prompt payment of publication fees as soon as their articles are accepted.

**Publication Fees:**

You will be contacted separately about payment when the proofs are issued; please follow the instructions in that e-mail. Arrangements for payment must be made before your article is published. For a complete list of **Publication Fees**, including supplemental material costs, please visit our [website](#).

Corresponding authors may [join or renew ASM membership](#) to obtain discounts on publication fees. Need to upgrade your membership level? Please contact Customer Service at [Service@asmusa.org](mailto:Service@asmusa.org).

**For mSystems research articles**, you are welcome to submit a short author video for your recently accepted paper. Videos are normally 1 minute long and are a great opportunity for junior authors to get greater exposure. Importantly, this video will not hold up the publication of your paper, and you can submit it at any time.

Details of the video are:

- Minimum resolution of 1280 x 720
- .mov or .mp4. video format
- Provide video in the highest quality possible, but do not exceed 1080p
- Provide a still/profile picture that is 640 (w) x 720 (h) max
- Provide the script that was used

We recognize that the video files can become quite large, and so to avoid quality loss ASM suggests sending the video file via <https://www.wetransfer.com/>. When you have a final version of the video and the still ready to share, please send it to mSystems staff at [mssystems@asmusa.org](mailto:mssystems@asmusa.org).

**For mSystems research articles**, if you would like to submit an image for consideration as the Featured Image for an issue, please contact mSystems staff at [mssystems@asmusa.org](mailto:mssystems@asmusa.org).

Thank you for submitting your paper to mSystems.

Sincerely,

Thomas Sharpton  
Editor, mSystems

Journals Department  
American Society for Microbiology  
1752 N St., NW  
Washington, DC 20036  
E-mail: [peerreview@asmusa.org](mailto:peerreview@asmusa.org)  
Phone: (202) 737-3600

Table S6: Accept  
Table S4: Accept  
Figure S2: Accept  
Table S3: Accept  
Table S5: Accept  
Table S2: Accept  
Table S1: Accept  
Table S7: Accept  
Figure S3: Accept  
Figure S1: Accept
